# Supplementary material
Source: publisher figshare collection journal article supplement (https://rs.figshare.com/ndownloader/files/28924043)
Supplement: Supplementary file 1 [file 28924043]

##SPECIES LEVEL ANALYSES##
#Testing predictions:
#iv) Dominance style predicts vocal repertoire size
#v) Dominance style predicts hierarchy-related repertoire size

# load the packages
library("MCMCglmm")
library("caper")
library("phangorn")
library("car")
library("MASS")

# load the species-level data
group_data<-read.csv("Species_Level_Data_060521.csv", header=T)
#Loading the phylogenetic tree
tree<-read.nexus("consensusTree_10kTrees_Primates_Version3_plus_kinda.nex")


#####Prediction iv) Repertoire Size = DV, Fixed effects = Dominance Style Composite Index + Group Size

##prepare data: creates dataset with only complete cases of all variables, and with all phylogentic information
complete_rep_DS<-group_data[complete.cases(group_data$Repertoire_Size, group_data$DOMINANCE_STYLE_SCORE),]
str(complete_rep_DS) #shows 21 species remaining
#Now incorporating phylogenetic information:
comp_repdata<-comparative.data(tree, complete_rep_DS, names.col="Species", vcv=TRUE, na.omit=FALSE)
# check for taxonomic mis-matches between data and tree
comp_repdata$dropped 
##Kinda baboons now included
str(comp_repdata) #21 species remaining.

# run a model fixing phylogenetic signal to the maximum; using log10 transformation on DV
repmodel<-pgls(log10(Repertoire_Size+1)~DOMINANCE_STYLE_SCORE+Group_Size, comp_repdata, lambda=1)
#summary of models shows no statistical significance at p<.05
summary(repmodel)


#####Prediction v) N Hierarchy-Related Signals = DV (log10 transformation), Fixed effects = Dominance Style Composite Index + Group Size

### complete_appease_DS = DATASET
complete_appease_ds<-group_data[complete.cases(group_data$Appeasement_Dominance_Signals, group_data$DOMINANCE_STYLE_SCORE),] #need to exclude missing cases
comp_appeasedata<-comparative.data(tree, complete_appease_ds, names.col="Species", vcv=TRUE, na.omit=FALSE)
# check for taxonomic mis-matches between data and tree
comp_appeasedata$dropped 
##Kinda baboons now included, leaving 21 species
str(comp_appeasedata)

# run a model fixing phylogenetic signal to the maximum (with dominance style composite and group size as predictors, log10 tranformation of N hierarchy signals as DV)
appeasemodel<-pgls(log10(Appeasement_Dominance_Signals+1)~DOMINANCE_STYLE_SCORE+Group_Size, comp_appeasedata, lambda=1)
summary(appeasemodel) #p=.001 for dominance style score


###now looking at intensity, counteraggression and agg DII separately
###INTENSITY

complete_appease_intensity<-group_data[complete.cases(group_data$Appeasement_Dominance_Signals, group_data$High_Intensity),] #need to exclude missing cases
comp_appeaseintdata<-comparative.data(tree, complete_appease_intensity, names.col="Species", vcv=TRUE, na.omit=FALSE)
# check for taxonomic mis-matches between data and tree
comp_appeaseintdata$dropped 
##Kinda baboons now included, leaving 17 species
str(comp_appeaseintdata)

# run a model fixing phylogenetic signal to the maximum (with aggression intensity  as predictor, log10 tranformation of N hierarchy signals as DV)

appeaseintmodel2<-pgls(log10(Appeasement_Dominance_Signals+1)~High_Intensity, comp_appeaseintdata, lambda=1)
summary(appeaseintmodel2) #p=.0002 for agg intensity


####COUNTERAGGRESSION
complete_appease_count<-group_data[complete.cases(group_data$Appeasement_Dominance_Signals, group_data$Counteraggression),] #need to exclude missing cases
comp_appeasecountdata<-comparative.data(tree, complete_appease_count, names.col="Species", vcv=TRUE, na.omit=FALSE)
# check for taxonomic mis-matches between data and tree
comp_appeasecountdata$dropped 
##Kinda baboons now included, leaving 16 species
str(comp_appeasecountdata)

# run a model fixing phylogenetic signal to the maximum (with counteraggressoin as predictor, log10 tranformation of N hierarchy signals as DV)
appeasecountmodel2<-pgls(log10(Appeasement_Dominance_Signals+1)~Counteraggression, comp_appeasecountdata, lambda=1)
summary(appeasecountmodel2) #p=.01 for counteraggression

#AGG DII
complete_appease_DII<-group_data[complete.cases(group_data$Appeasement_Dominance_Signals, group_data$DII_Aggression),] #need to exclude missing cases
comp_appeaseDIIdata<-comparative.data(tree, complete_appease_DII, names.col="Species", vcv=TRUE, na.omit=FALSE)
# check for taxonomic mis-matches between data and tree
comp_appeaseDIIdata$dropped 
##Kinda baboons now included, leaving 21 species
str(comp_appeaseDIIdata)

# run a model fixing phylogenetic signal to the maximum
appeaseDIImodel<-pgls(log10(Appeasement_Dominance_Signals+1)~DII_Aggression, comp_appeaseDIIdata, lambda=1)
summary(appeaseDIImodel) #NS for Agg DII


#GROUP SIZE
complete_appease_group<-group_data[complete.cases(group_data$Appeasement_Dominance_Signals, group_data$Group_Size),] #need to exclude missing cases
comp_appeasegroupdata<-comparative.data(tree, complete_appease_group, names.col="Species", vcv=TRUE, na.omit=FALSE)
# check for taxonomic mis-matches between data and tree
comp_appeasegroupdata$dropped 
##Kinda baboons now included, leaving 25 species
str(comp_appeasegroupdata)

# run a model fixing phylogenetic signal to the maximum
appeasegroupmodel<-pgls(log10(Appeasement_Dominance_Signals+1)~Group_Size, comp_appeasegroupdata, lambda=1)
summary(appeasegroupmodel) #NS for Group Size
